# Supplementary material for: Modeling refractive correction strategies in keratoconus
Source: PubMed Central journal article supplement (PMC8475278; doi:10.1167/jov.21.10.18), 2021-09-23

Visual Strehl patterns of

# 20 Normal SyntEyes

(Cutoff 0.01)

**SyntEye 1 Spectacle correction**

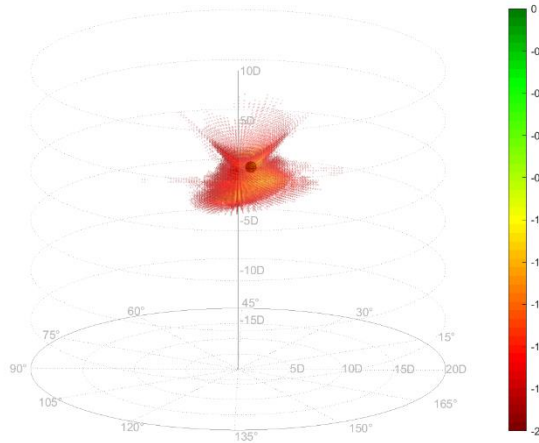

**SyntEye 1 Scleral lens correction**

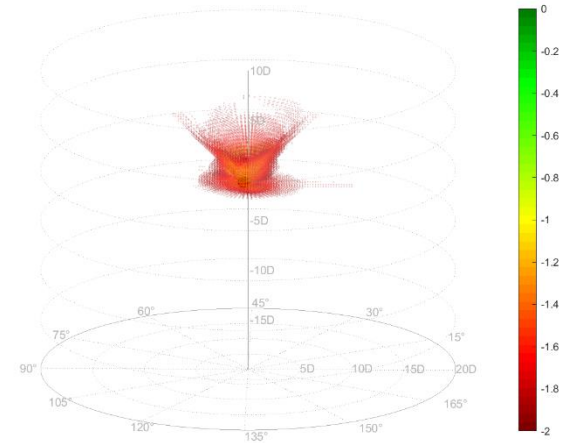

**SyntEye 2 Spectacle correction**

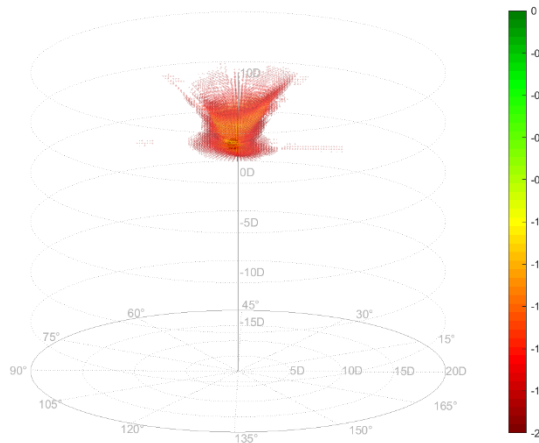

**SyntEye 2 Scleral lens correction**

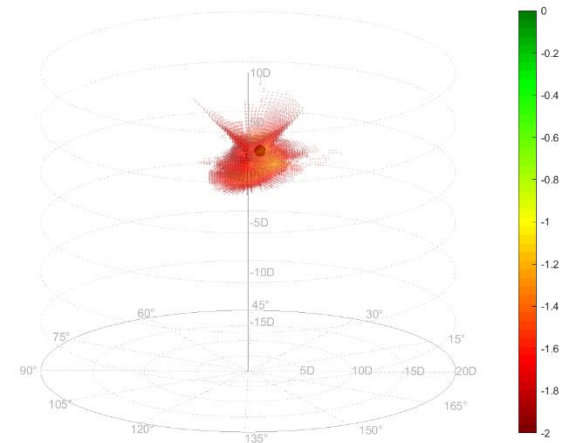

**SyntEye 3 Spectacle correction**

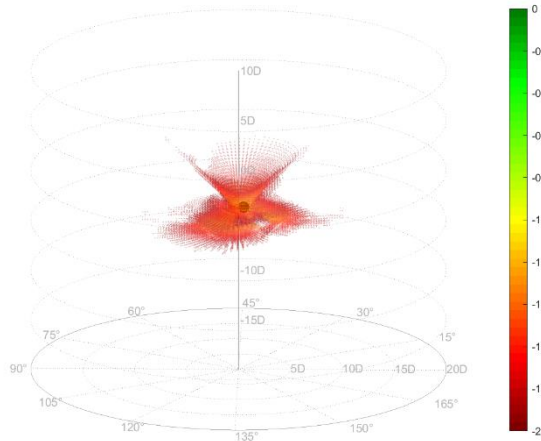

**SyntEye 3 Scleral lens correction**

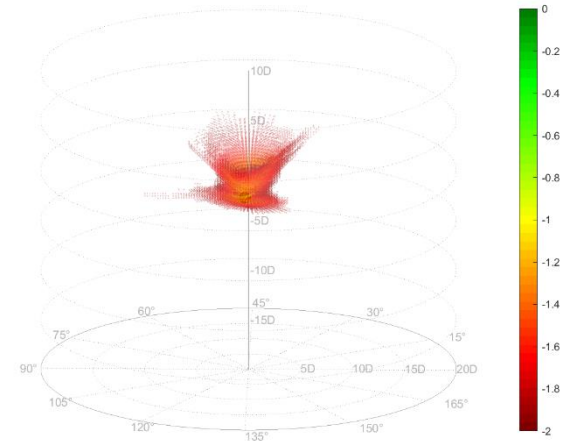

**SyntEye 4 Spectacle correction**

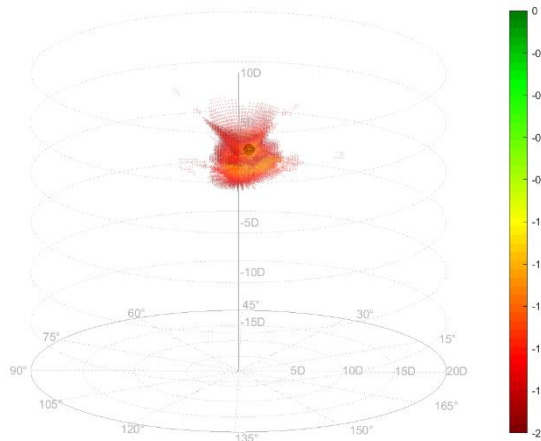

**SyntEye 4 Scleral lens correction**

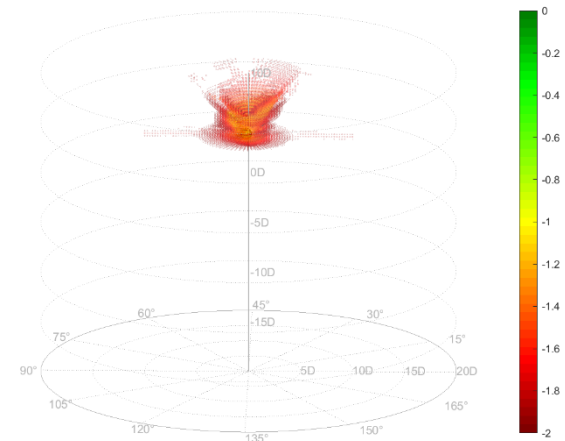

**SyntEye 5 Spectacle correction**

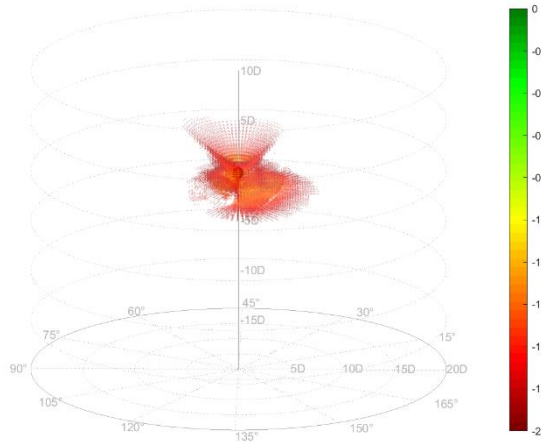

**SyntEye 5 Scleral lens correction**

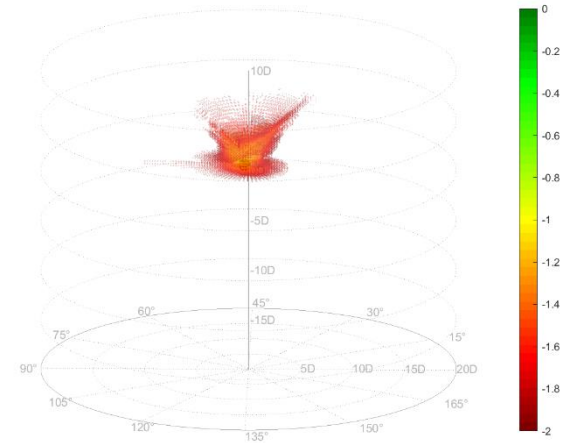

**SyntEye 6 Spectacle correction**

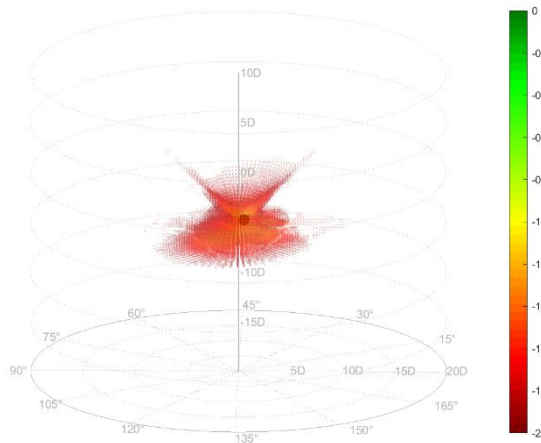

**SyntEye 6 Scleral lens correction**

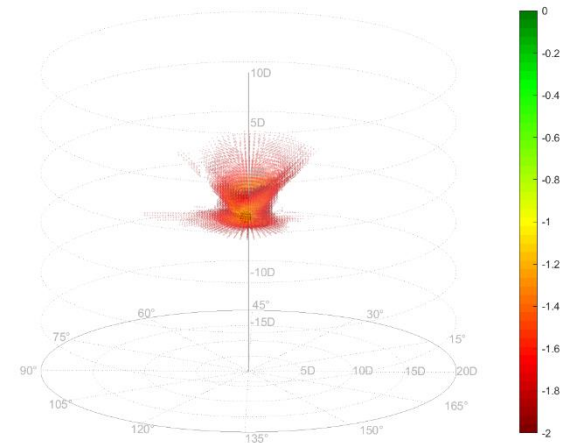

### SyntEye 7 Spectacle correction

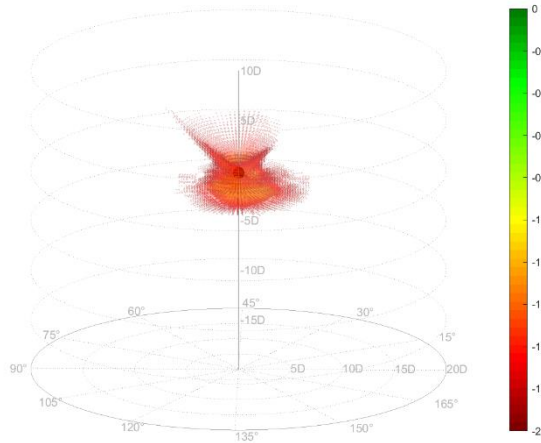

### SyntEye 7 Scleral lens correction

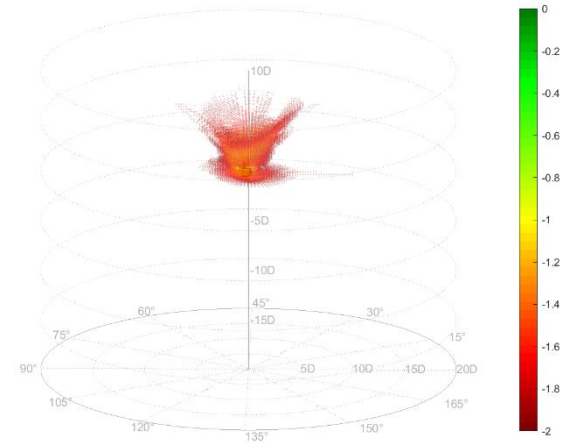

### SyntEye 8 Spectacle correction

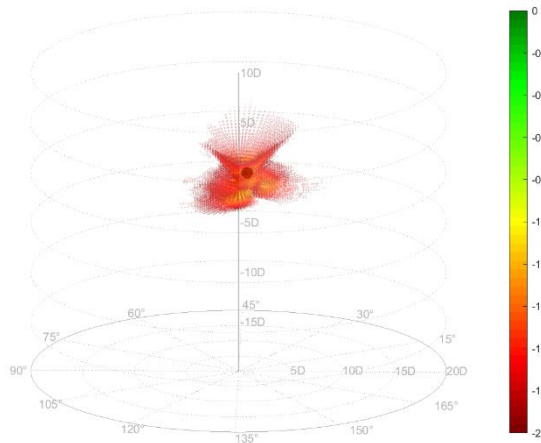

### SyntEye 8 Scleral lens correction

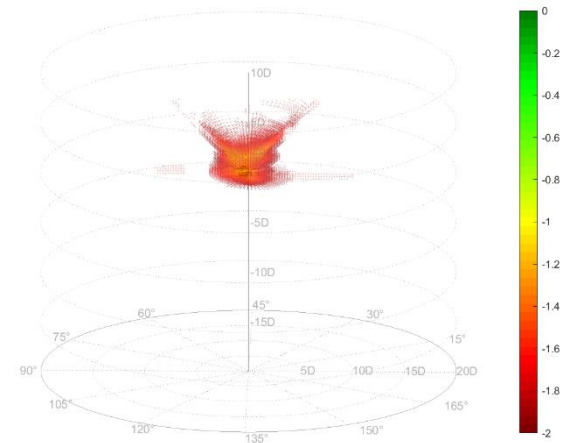

**SyntEye 9 Spectacle correction**

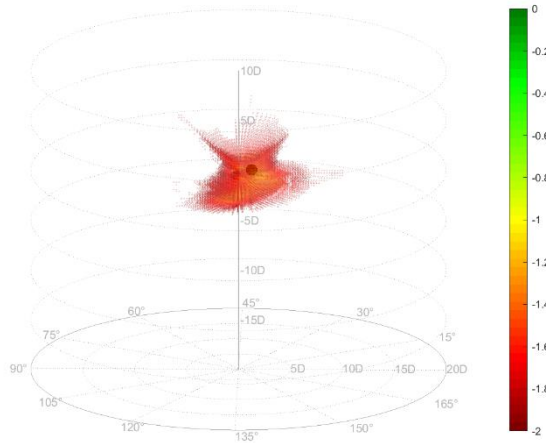

**SyntEye 9 Scleral lens correction**

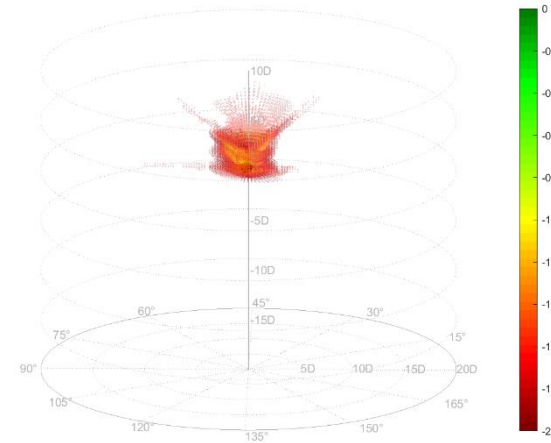

**SyntEye 10 Spectacle correction**

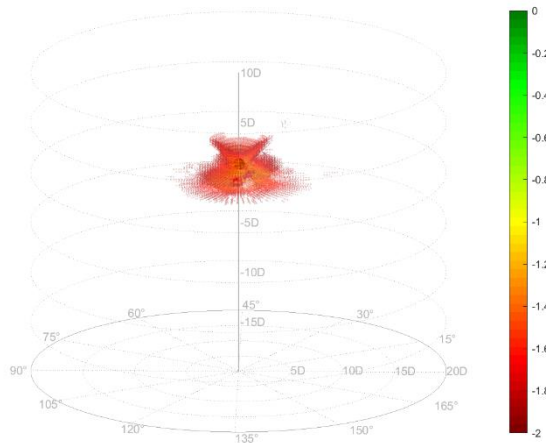

**SyntEye 10 Scleral lens correction**

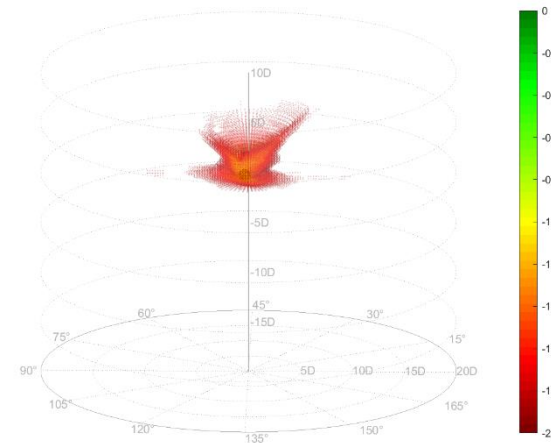

**SyntEye 11 Spectacle correction**

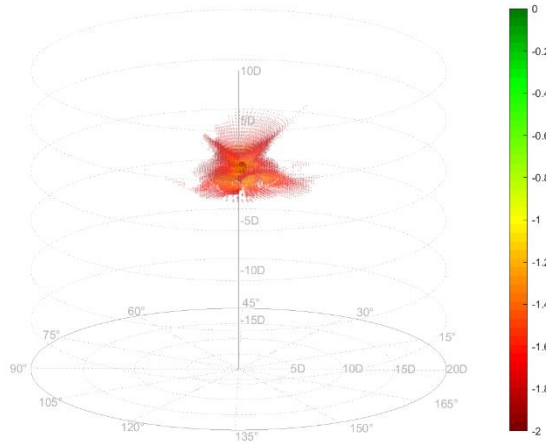

**SyntEye 11 Scleral lens correction**

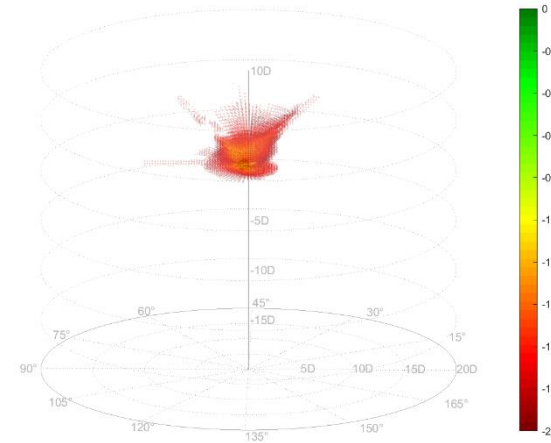

**SyntEye 12 Spectacle correction**

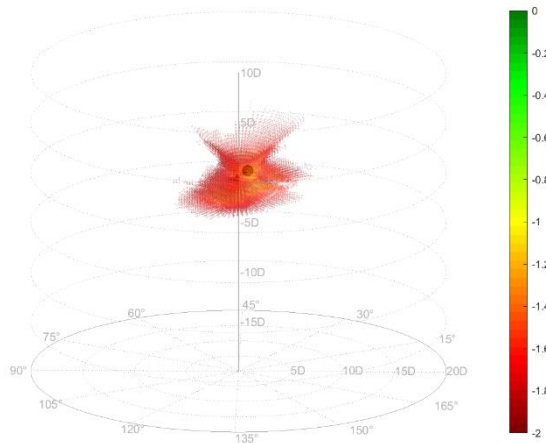

**SyntEye 12 Scleral lens correction**

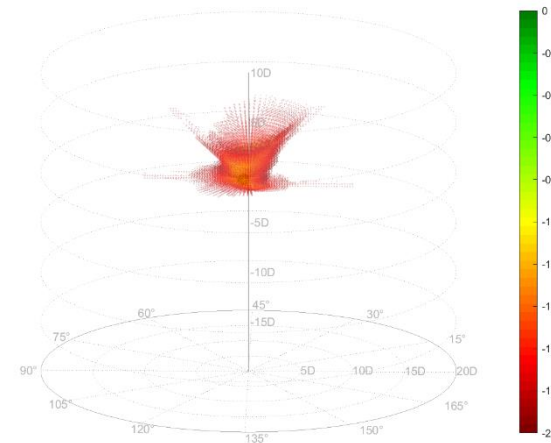

**SyntEye 13 Spectacle correction**

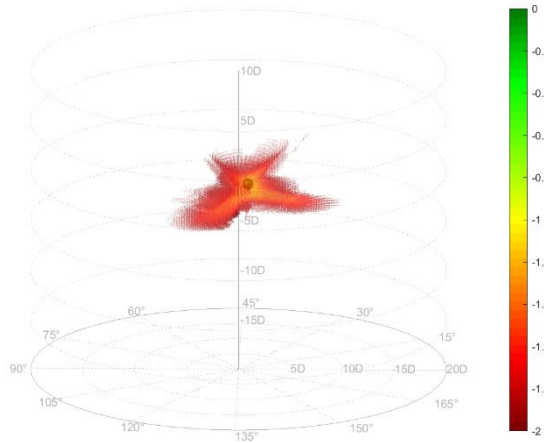

**SyntEye 13 Scleral lens correction**

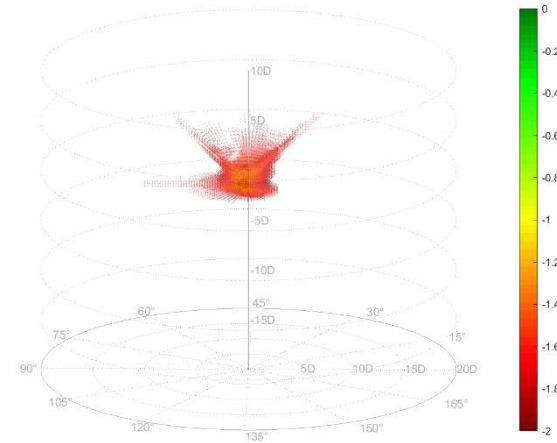

**SyntEye 14 Spectacle correction**

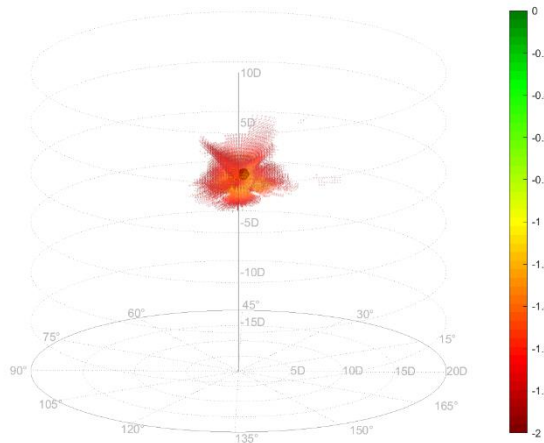

**SyntEye 14 Scleral lens correction**

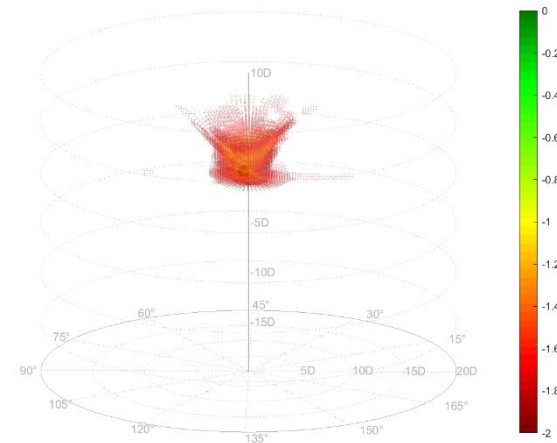



**SyntEye 15 Spectacle correction**

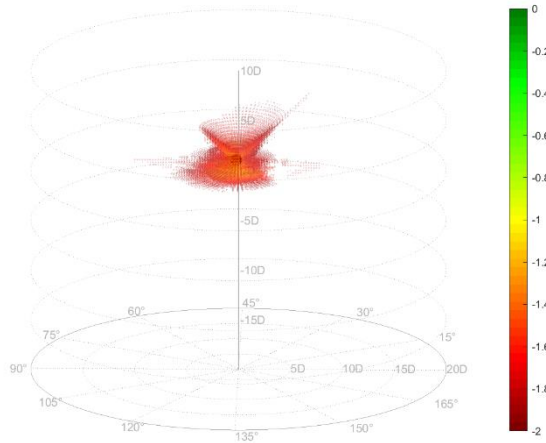

**SyntEye 15 Scleral lens correction**

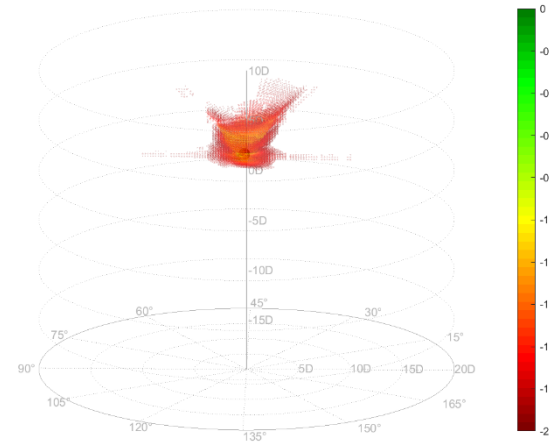

**SyntEye 16 Spectacle correction**

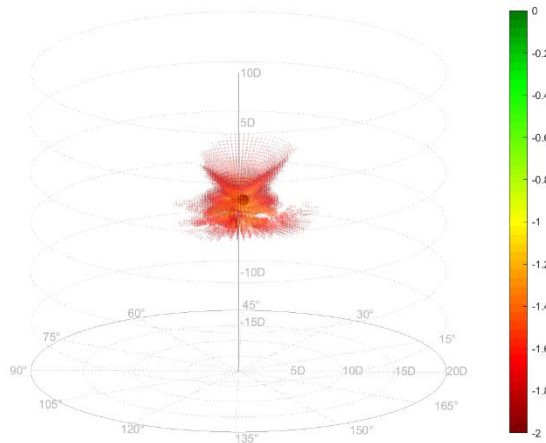

**SyntEye 16 Scleral lens correction**

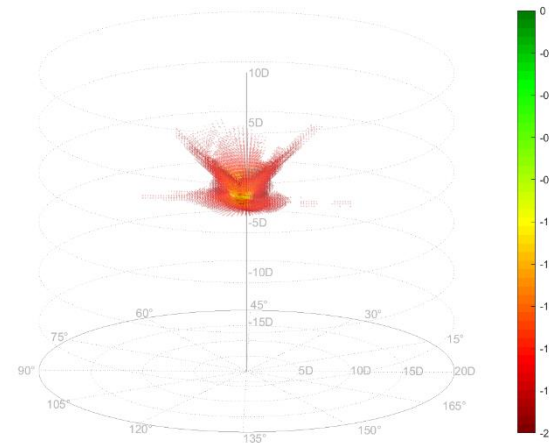

**SyntEye 18 Spectacle correction**

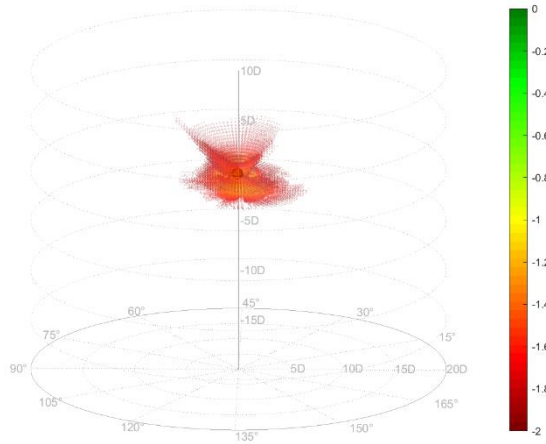

**SyntEye 18 Scleral lens correction**

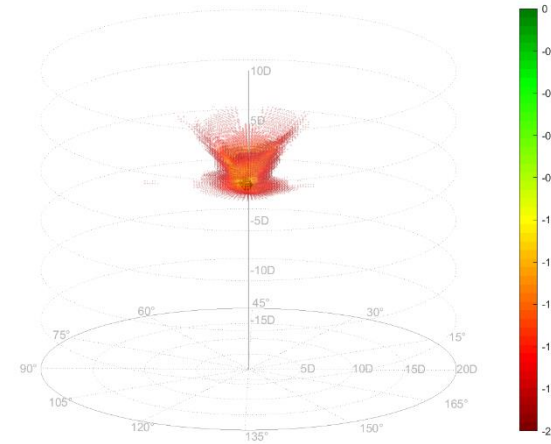

**SyntEye 20 Spectacle correction**

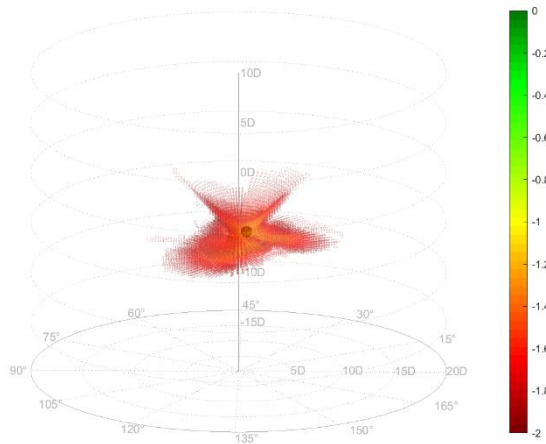

**SyntEye 20 Scleral lens correction**

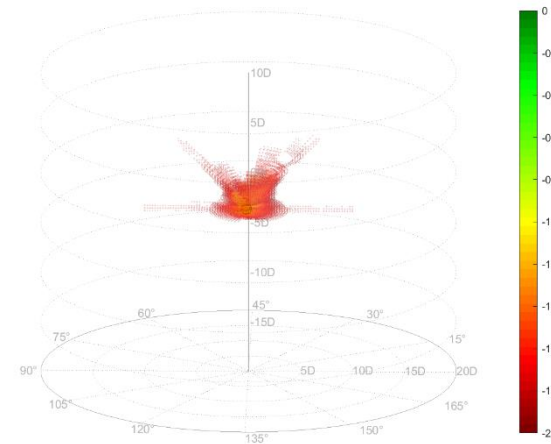

**SyntEye 21 Spectacle correction**

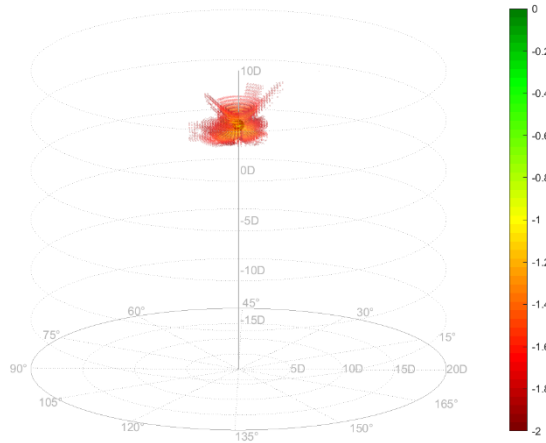

**SyntEye 21 Scleral lens correction**

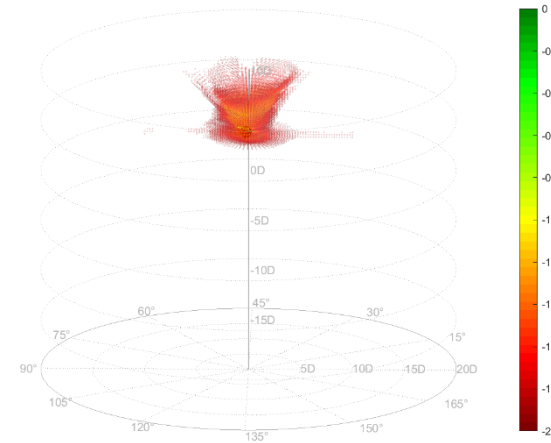

**SyntEye 23 Spectacle correction**

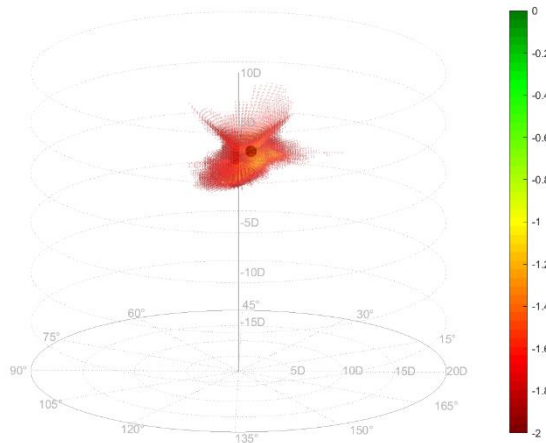

**SyntEye 23 Scleral lens correction**

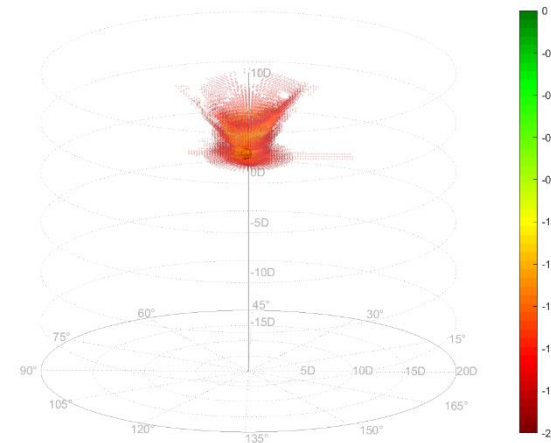

Visual Strehl patterns of

# 20 Keratoconic SyntEyes

(Cutoff 0.01)

**SyntEye KTC 1 Spectacle correction**

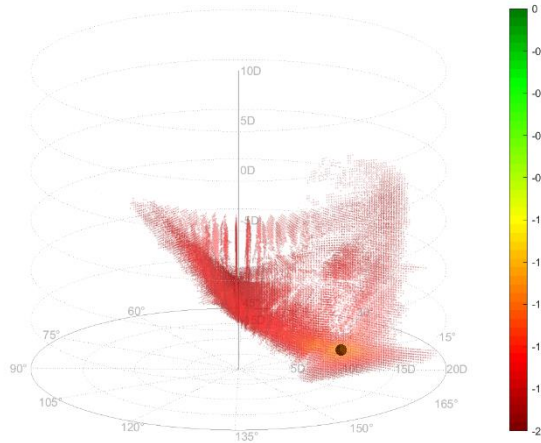

**SyntEye KTC 1 Scleral lens correction**

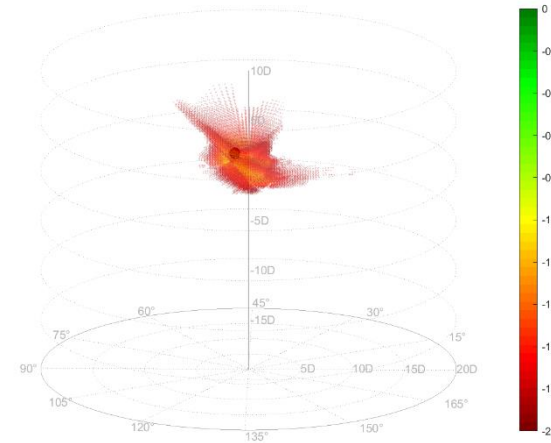

**SyntEye KTC 2 Spectacle correction**

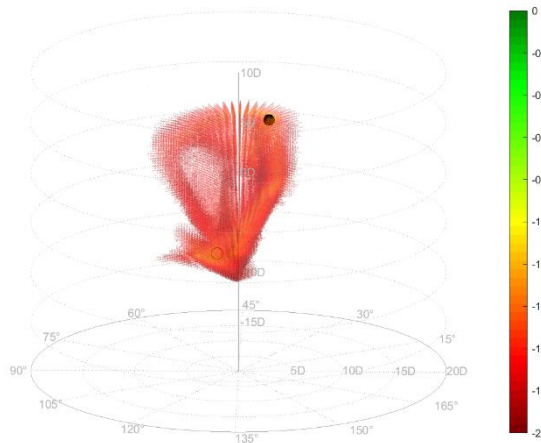

**SyntEye KTC 2 Scleral lens correction**

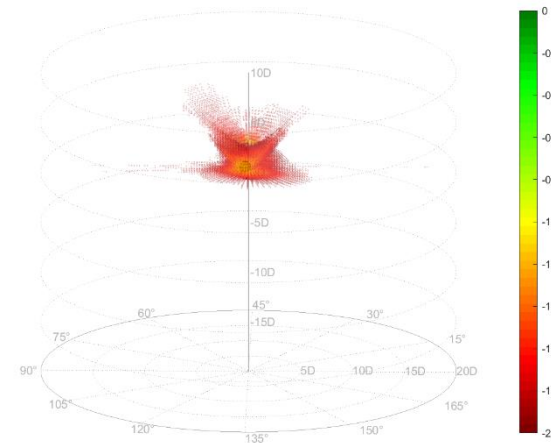

**SyntEye KTC 3 Spectacle correction**

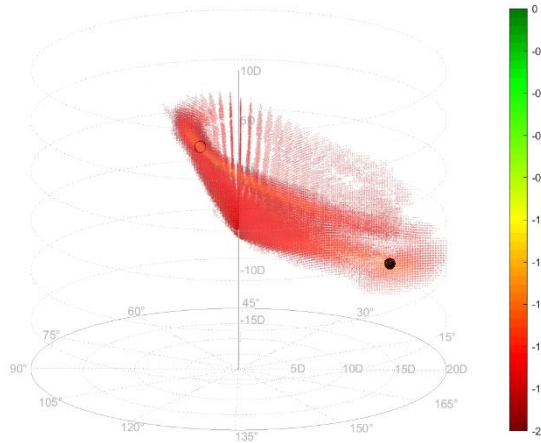

**SyntEye KTC 3 Scleral lens correction**

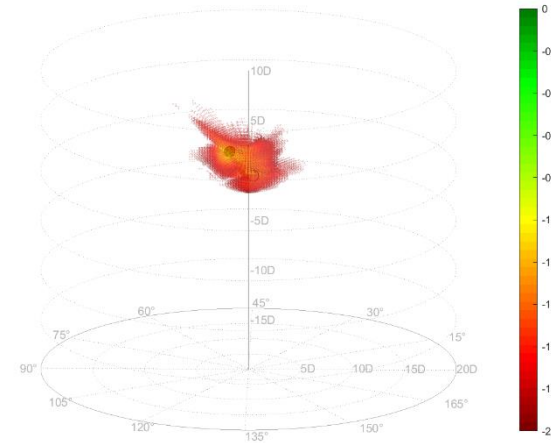

**SyntEye KTC 4 Spectacle correction**

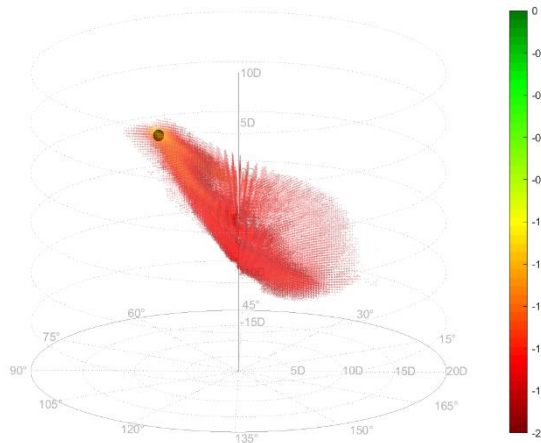

**SyntEye KTC 4 Scleral lens correction**

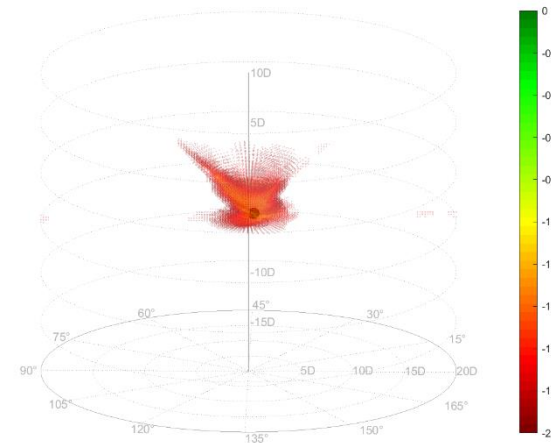

**SyntEye KTC 6 Spectacle correction**

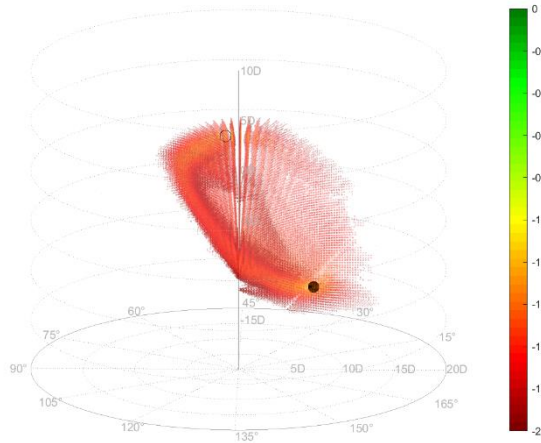

**SyntEye KTC 6 Scleral lens correction**

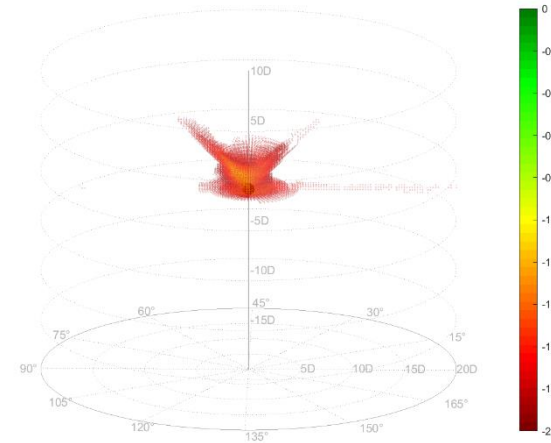

**SyntEye KTC 7 Spectacle correction**

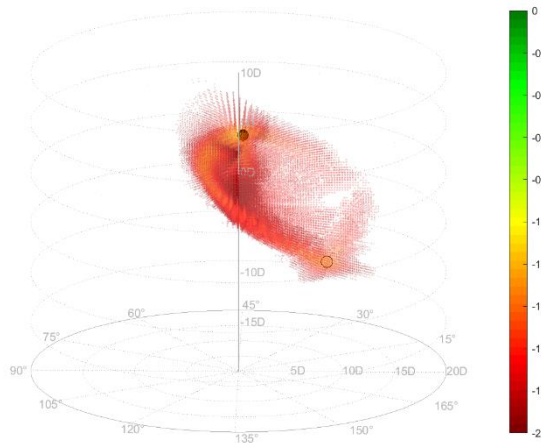

**SyntEye KTC 7 Scleral lens correction**

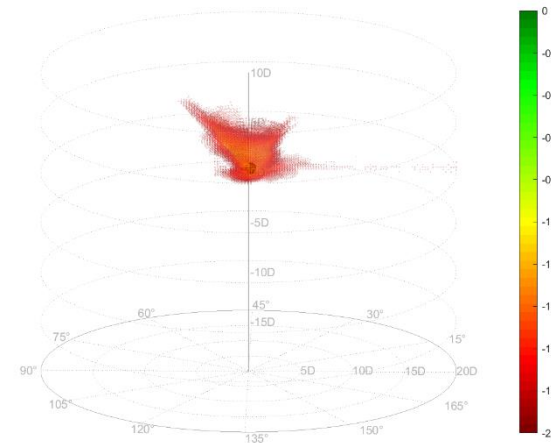

**SyntEye KTC 9 Spectacle correction**

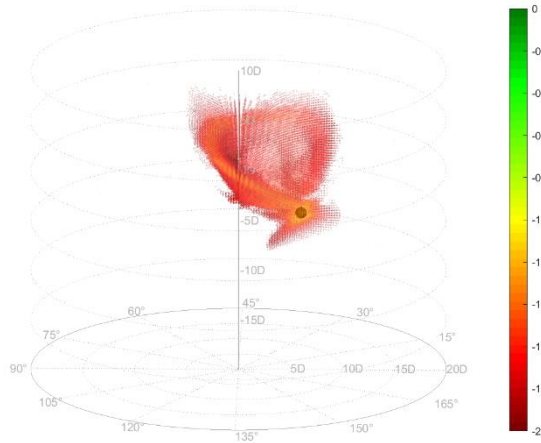

**SyntEye KTC 9 Scleral lens correction**

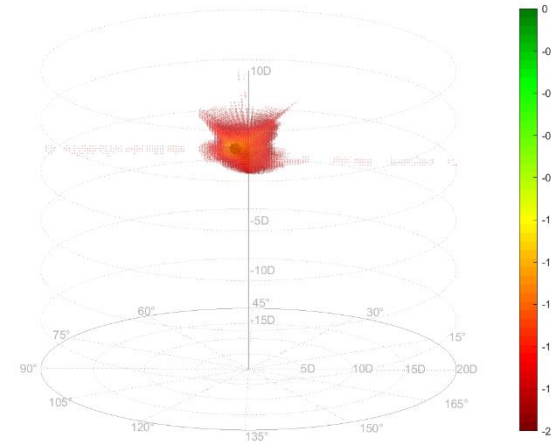

**SyntEye KTC 10 Spectacle correction**

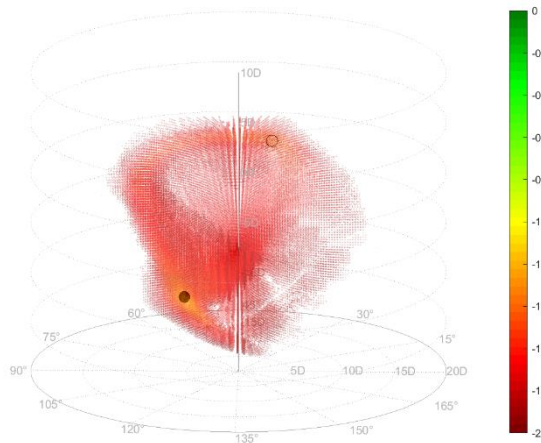

**SyntEye KTC 10 Scleral lens correction**

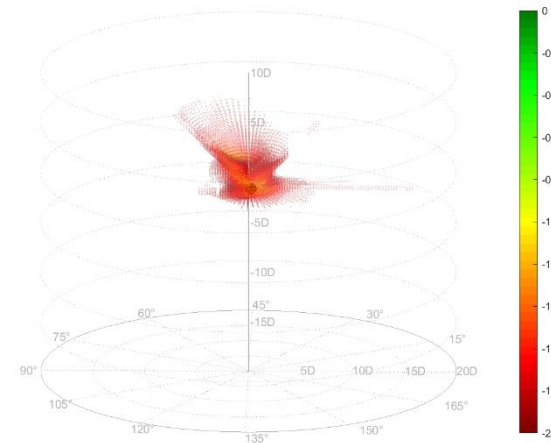



**SyntEye KTC 14 Spectacle correction**

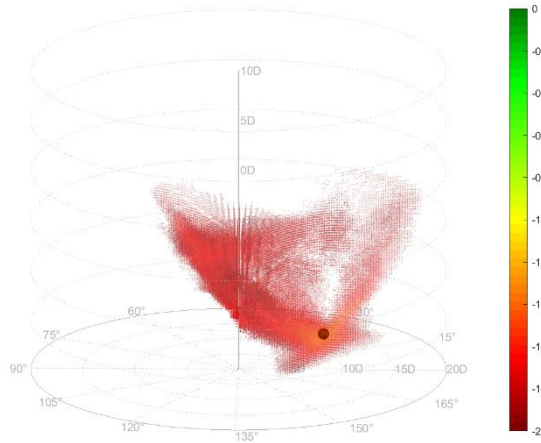

**SyntEye KTC 14 Scleral lens correction**

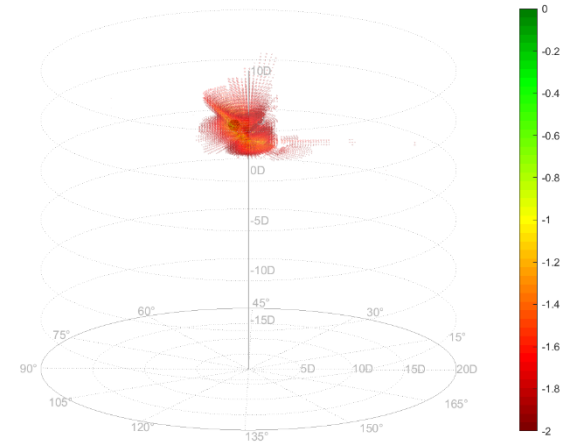

**SyntEye KTC 15 Spectacle correction**

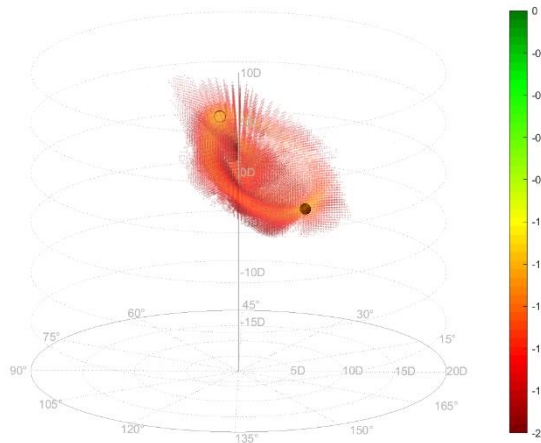

**SyntEye KTC 15 Scleral lens correction**

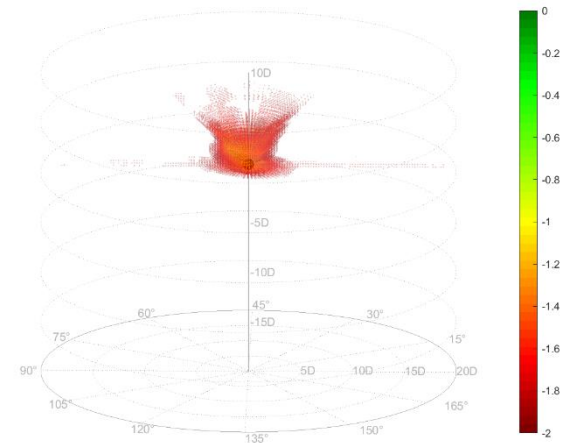

**SyntEye KTC 16 Spectacle correction**

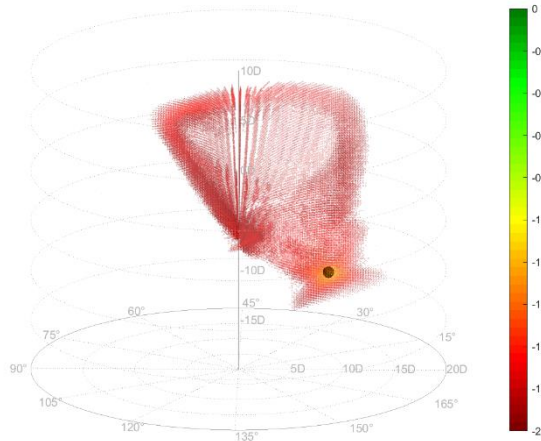

**SyntEye KTC 16 Scleral lens correction**

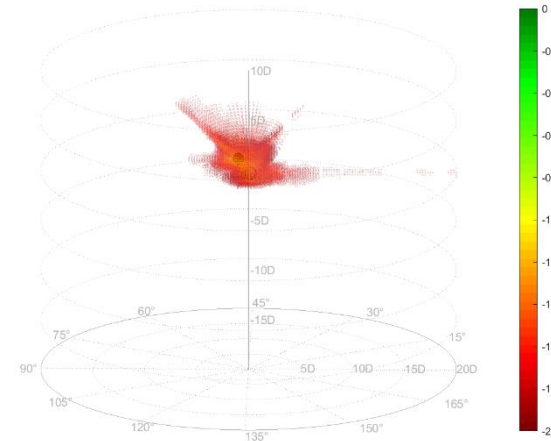

**SyntEye KTC 17 Spectacle correction**

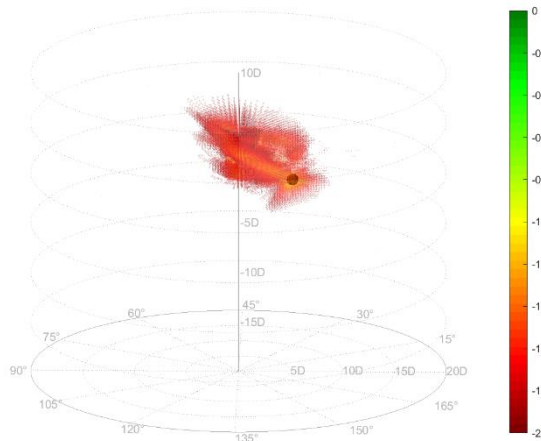

**SyntEye KTC 17 Scleral lens correction**

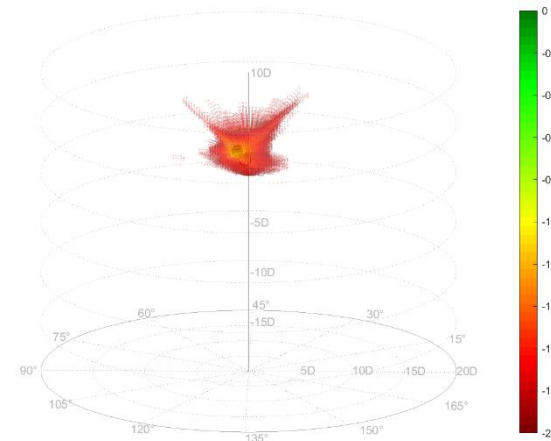

**SyntEye KTC 18 Spectacle correction**

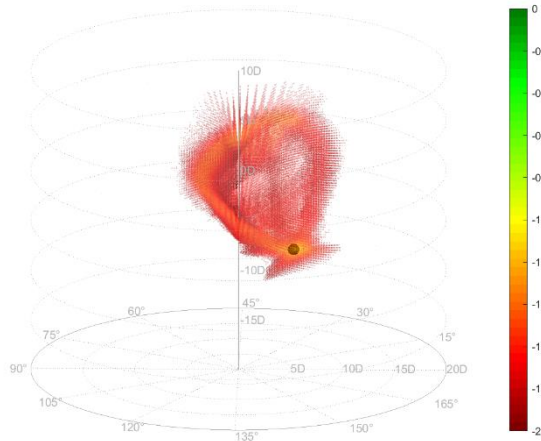

**SyntEye KTC 18 Scleral lens correction**

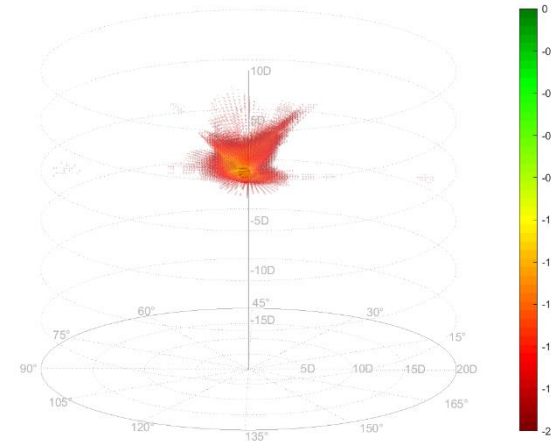

**SyntEye KTC 21 Spectacle correction**

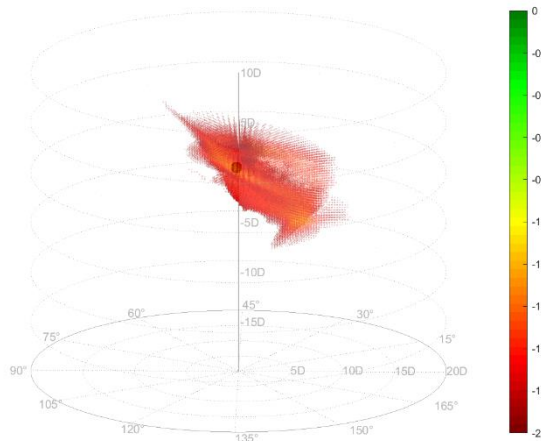

**SyntEye KTC 21 Scleral lens correction**

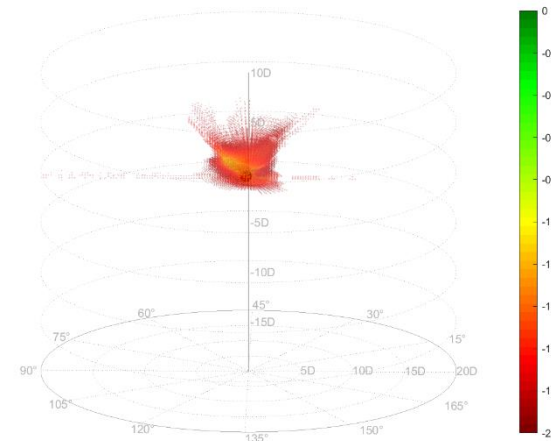

**SyntEye KTC 22 Spectacle correction**

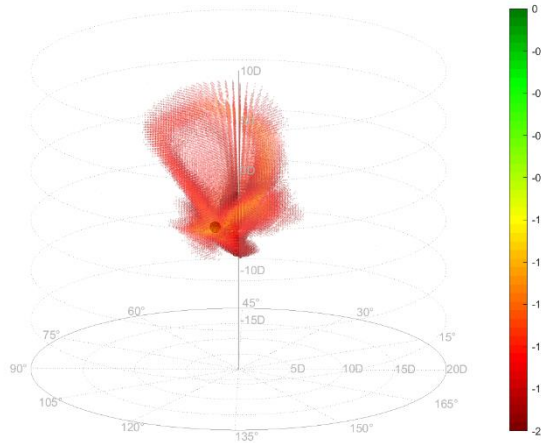

**SyntEye KTC 22 Scleral lens correction**

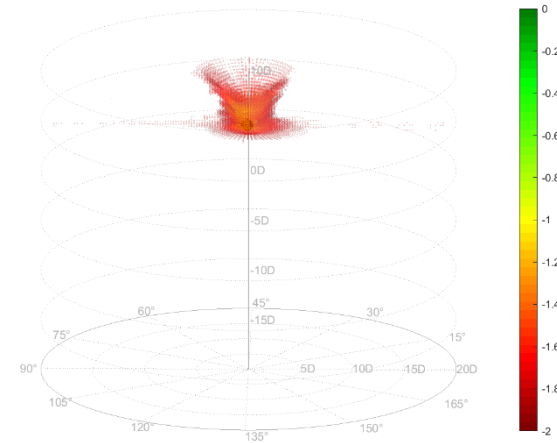

**SyntEye KTC 23 Spectacle correction**

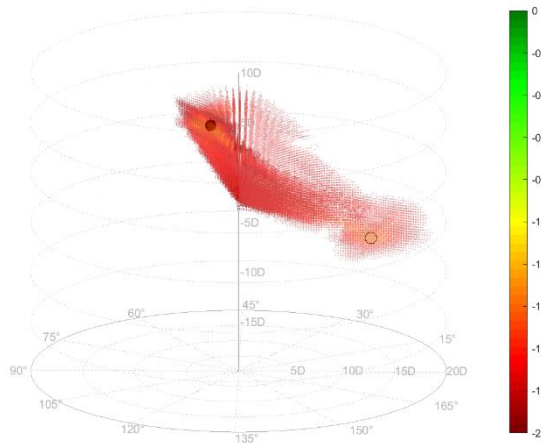

**SyntEye KTC 23 Scleral lens correction**

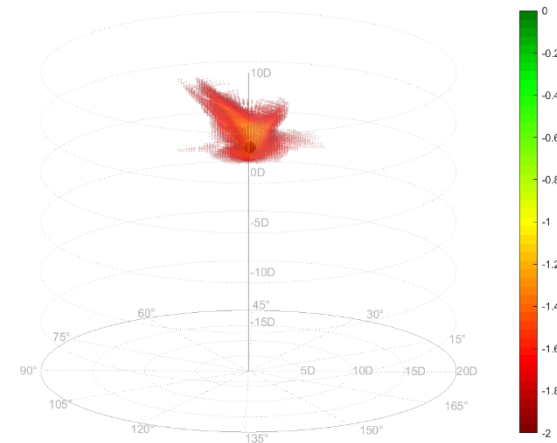

**SyntEye KTC 24 Spectacle correction**

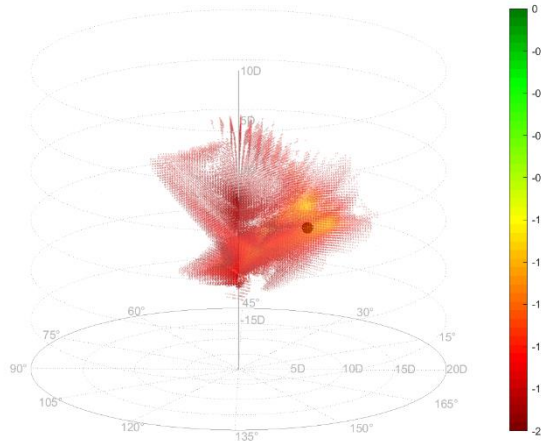

**SyntEye KTC 24 Scleral lens correction**

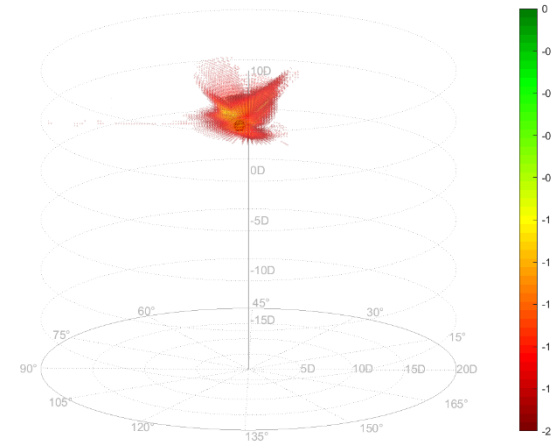

**SyntEye KTC 26 Spectacle correction**

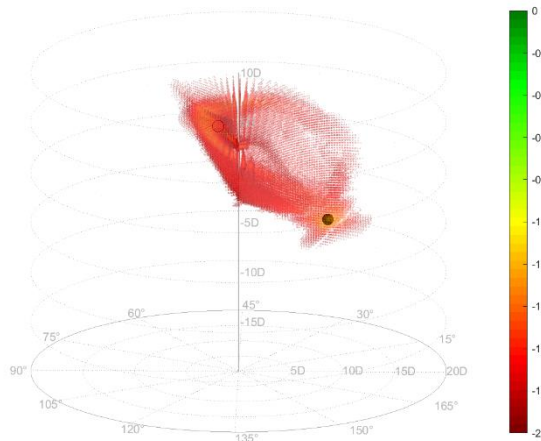

**SyntEye KTC 26 Scleral lens correction**

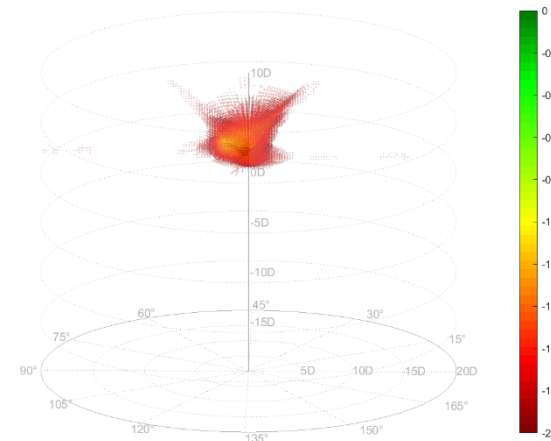

**SyntEye KTC 27 Spectacle correction**

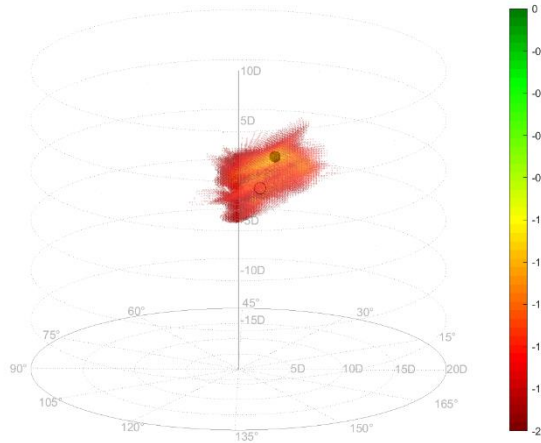

**SyntEye KTC 27 Scleral lens correction**

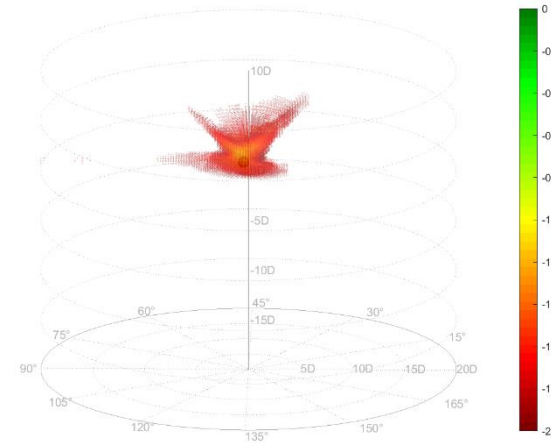

**SyntEye KTC 28 Spectacle correction**

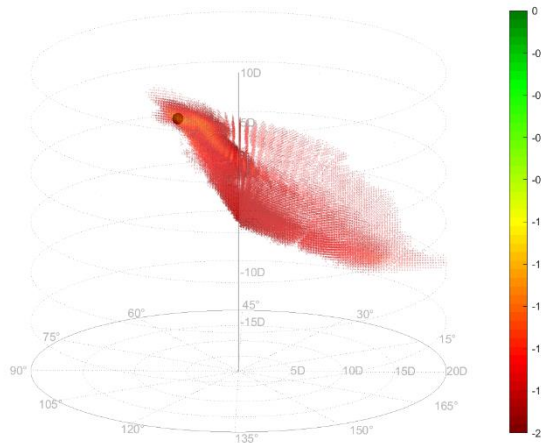

**SyntEye KTC 28 Scleral lens correction**

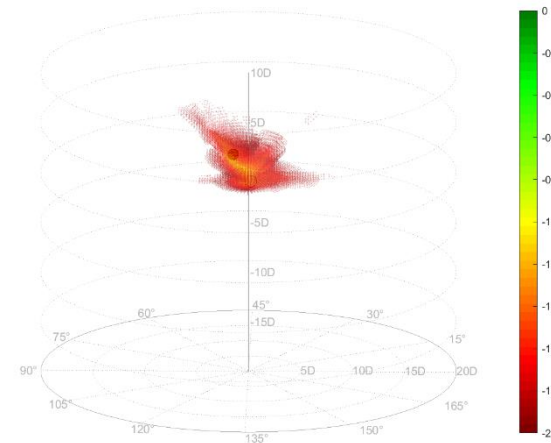

Supplement: jovi-21-10-18_s001.pdf [file jovi-21-10-18_s001.pdf]
